# Supplementary material
Source: publisher site journal article supplement (https://www.dovepress.com/get_supplementary_file.php?f=505865.docx)
Supplement: Supplementary file 1 [file get_supplementary_file.php]

Supplementary Material

# Supplementary Tables

**Supplementary Table S1.** **Genes that have been reported to be related to inherited HCM.**

| **Gene** | **Mode of inheritance** |
| --- | --- |
| *MYBPC3* | AD, AR |
| *MYH7* | AD |
| *TNNT2* | AD |
| *TNNI3* | AD |
| *TPM1* | AD |
| *ACTC1* | AD |
| *MYL3* | AD, AR |
| *MYL2* | AD |
| *PLN* | - |
| *TNNC1* | AD |
| *JPH2* | AD |
| *CSRP3* | AD |
| *TTN* | AD |
| *KLF10* | AD |
| *MYPN* | AD |
| *ANKRD1* | AD |
| *MYLK2* | AD |
| *MYOZ2* | AD |
| *NEXN* | AD |
| *VCL* | AD |
| *TRIM63* | AD |
| *RYR2* | AD |
| *MYH6* | AD |
| *OBSCN* | AD |
| *PDLIM3* | AD |
| *TCAP* | AD |
| *MYOM1* | AD |
| *CALR3* | AD |

AD, autosomal dominant; AR, autosomal recessive.

**Supplementary Table S2.** **Classification of variants detected by WES.**

| **Variants type** | **Ⅱ1** | **Ⅲ1** |
| --- | --- | --- |
| **Total variants detected（Indel）** | 15714 | 15060 |
| Frameshift deletion | 87 | 98 |
| Non-frameshift deletion | 215 | 216 |
| Frameshift insertion | 86 | 87 |
| Non-frameshift insertion | 214 | 218 |
| **Total variants detected（SNV）** | 83534 | 82844 |
| Heterozygotes | 47779 | 47031 |
| Homozygotes | 35755 | 35813 |
| Exonic | 19947 | 19843 |
| Splicing | 58 | 65 |
| Intergenic | 2474 | 2435 |
| Intronic | 51324 | 50913 |
| UTR3 | 2893 | 2827 |
| UTR5 | 1891 | 1857 |
| Nonsynonymous SNV | 9045 | 8973 |
| Synonymous SNV | 10444 | 10445 |
| Stop-gain SNV | 59 | 62 |
| Stop-loss SNV | 7 | 6 |
| Unknown | 443 | 413 |
